# Supplementary material
Source: PubMed Central journal article supplement (PMC7229689)
Supplement: pnas.1922879117.sapp.pdf [file pnas.1922879117.sapp.pdf]

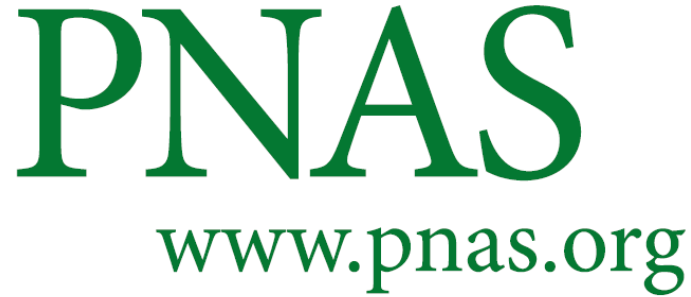

***Supplementary Information for:***

**Cultured macrophages transfer surplus cholesterol into adjacent cells in the absence of serum or high-density lipoproteins**

Cuiwen He\*, Haibo Jiang\*, Wenxin Song, Howard Riezman, Peter Tontonoz, Thomas A. Weston, Paul Guagliardo, Paul H. Kim, Rachel Jung, Patrick Heizer, Loren G. Fong, and Stephen G. Young

\*Cuiwen He and Haibo Jiang wish to be identified as co-first authors.

Correspondence: Loren G. Fong or Stephen G. Young, 675 Charles E. Young Dr. South, Los Angeles, CA 90095. Tel: (310) 825-4997 (Fong); (310) 825-4934 (Young); Fax: (310) 206-0865; E-mail: lfong@mednet.ucla.edu, sgyoung@mednet.ucla.edu

**This PDF file includes: Figures S1–S11, Table S1**

*SI Appendix* Figures S1–S10

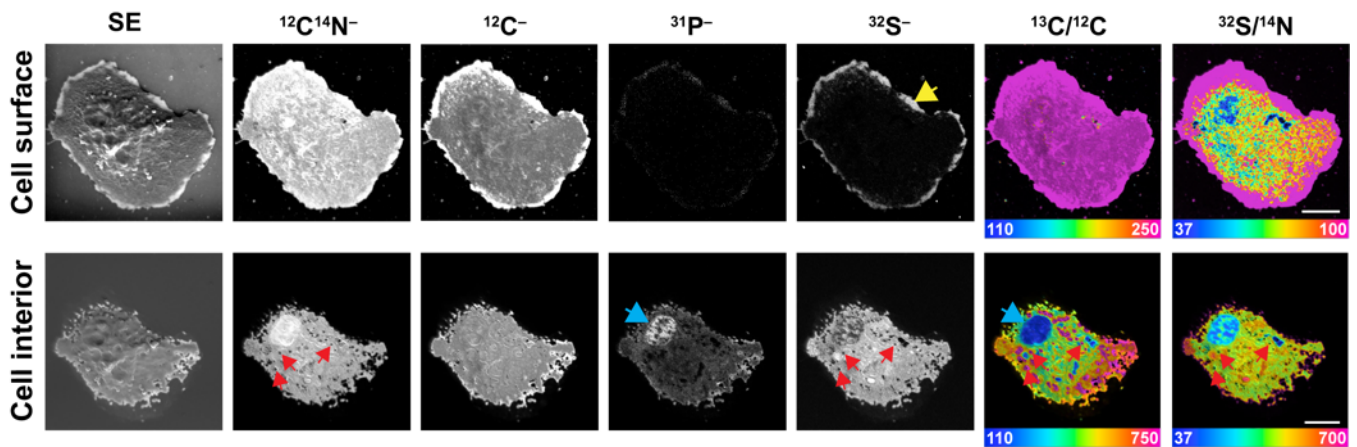

**Fig. S1. NanoSIMS images of a [ $^{13}\text{C}$ ]cholesterol-loaded mouse peritoneal macrophage.** Macrophages loaded with [ $^{13}\text{C}$ ]cholesterol were plated on a poly-D-lysine-coated silicon wafer and incubated for 24 h in serum-free medium. Secondary electron and secondary ion NanoSIMS images from the cell surface (top row) and cell interior (bottom row) are shown for a representative macrophage. The  $^{32}\text{S}$ -rich region at the edge of the cell surface reflects extracellular heparan-sulfate proteoglycans (yellow arrow). Note the high  $^{31}\text{P}$ - signal and low  $^{13}\text{C}/^{12}\text{C}$  ratio in the nucleus (blue arrows). Red arrows point to examples of cytosolic LDs (identified in the  $^{12}\text{C}^{14}\text{N}$ - and  $^{32}\text{S}$ - images) enriched in  $^{13}\text{C}$ . Ratio scales were multiplied by 10,000. Scale bar, 10  $\mu\text{m}$ .

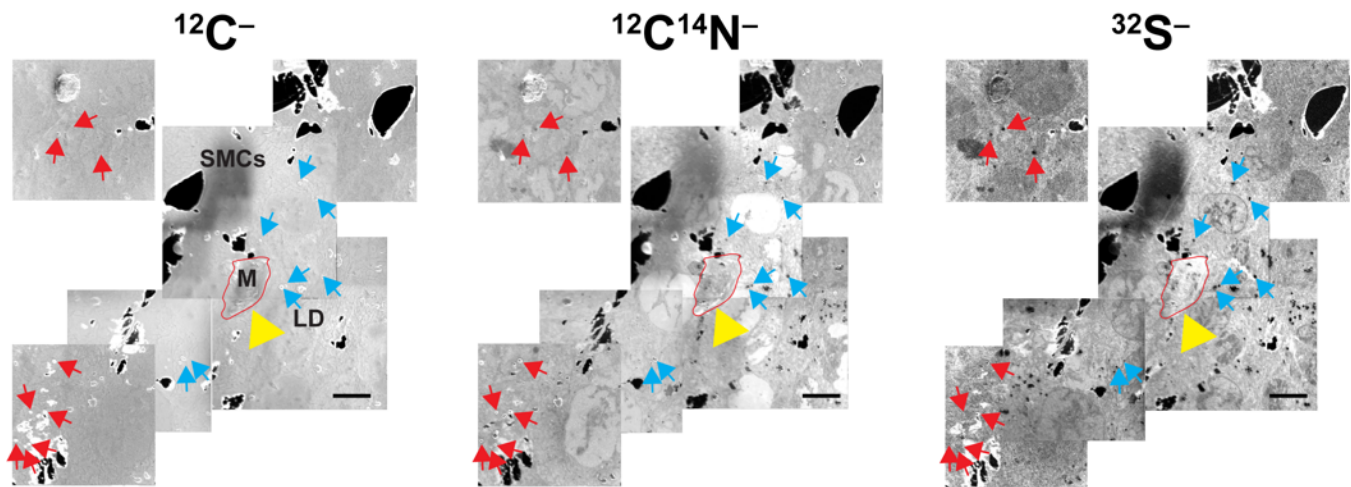

**Fig. S2. Macrophages (M), smooth muscle cells (SMCs), and cytosolic lipid droplets (LDs) can be identified in  $^{12}\text{C}^-$ ,  $^{12}\text{C}^{14}\text{N}^-$ , and  $^{32}\text{S}^-$  NanoSIMS images.** The images shown here correspond to the  $^{13}\text{C}/^{12}\text{C}$  and  $^{15}\text{N}/^{14}\text{N}$  images in **Fig. 1**. A single [ $^{13}\text{C}$ ]cholesterol-loaded macrophage, outlined in red and noted with a yellow arrowhead, is located on a monolayer of [ $^{15}\text{N}$ ]choline-enriched SMCs. The large black holes represent regions of the silicon wafer not covered by cells. Small black holes in the  $^{12}\text{C}^{14}\text{N}^-$  and  $^{32}\text{S}^-$  images represent cytosolic LDs, which contain negligible amounts of  $^{14}\text{N}$  or  $^{32}\text{S}$ . The LDs appear white in the  $^{12}\text{C}^-$  image. Blue arrows depict cytosolic LDs in SMCs adjacent to a macrophage; red arrows depict cytosolic LDs in more distant SMCs. Note the high  $^{32}\text{S}$  content of the macrophage (also apparent in **Fig. 1C**). Scale bar, 10  $\mu\text{m}$ .

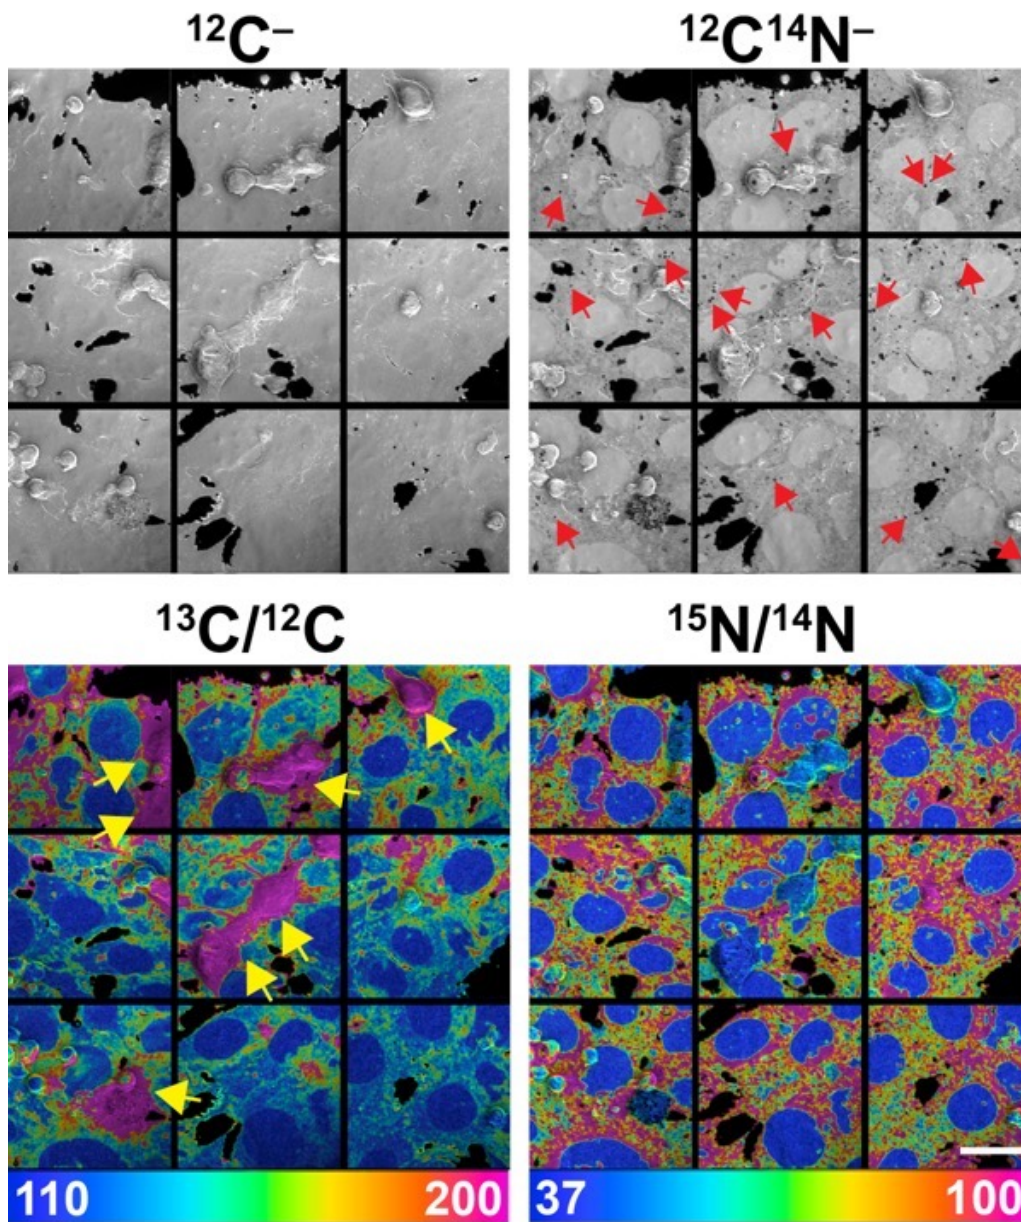

**Fig. S3. NanoSIMS mosaics of [ $^{13}\text{C}$ ]cholesterol-loaded macrophages that had been plated on a monolayer of [ $^{15}\text{N}$ ]choline-enriched smooth muscle cells (SMCs).** The  $^{12}\text{C}^-$ ,  $^{12}\text{C}^{14}\text{N}^-$ ,  $^{13}\text{C}/^{12}\text{C}$ , and  $^{15}\text{N}/^{14}\text{N}$  NanoSIMS mosaic images show a  $\sim 150\ \mu\text{m} \times 150\ \mu\text{m}$  region containing multiple macrophages (yellow arrows). The large black holes represent regions without cells. Small black regions in the  $^{12}\text{C}^{14}\text{N}^-$  images represent cytosolic lipid droplets (red arrows), which contain negligible amounts of  $^{14}\text{N}$ . Ratio scales were multiplied by 10,000. In this study, the number of macrophages was large; hence,  $^{13}\text{C}$  enrichment was observed in all SMCs in the field. Scale bar, 20  $\mu\text{m}$ .

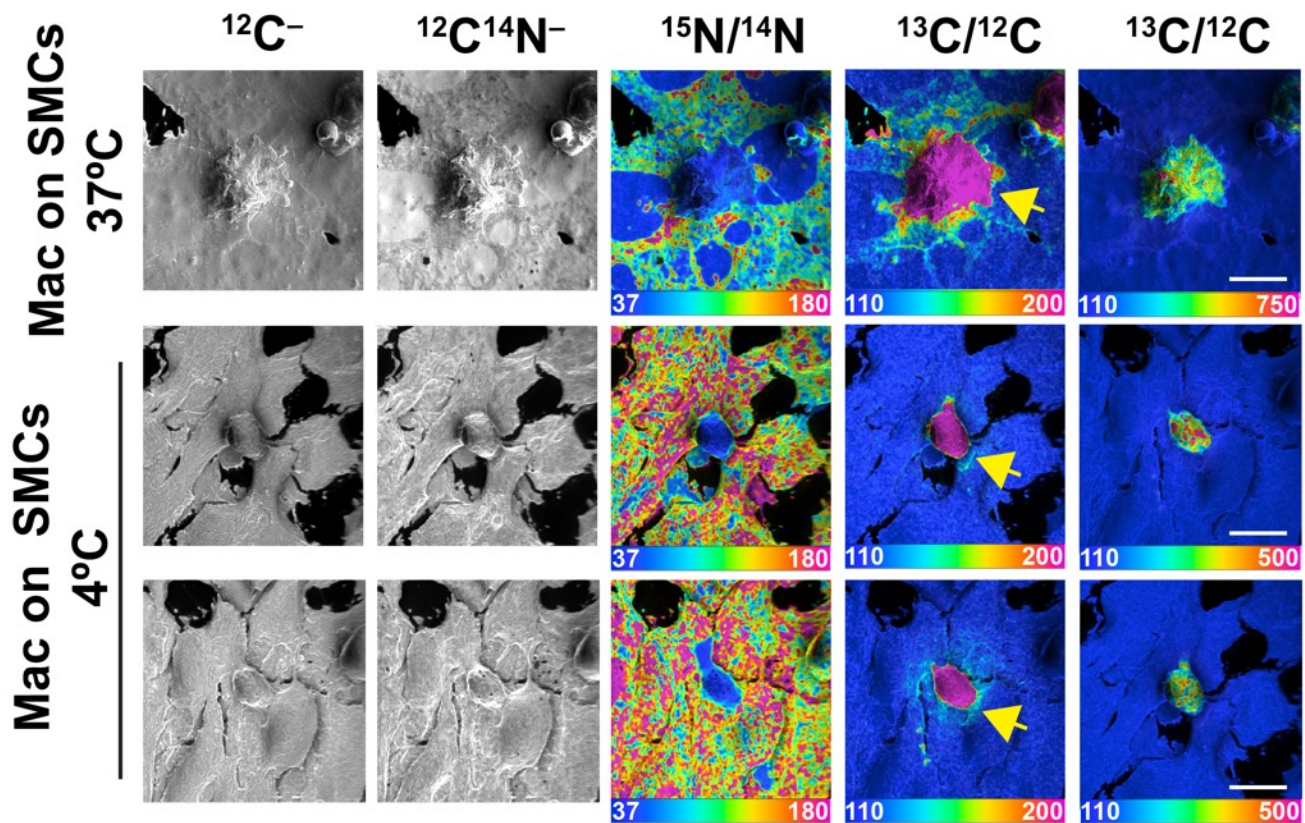

**Fig. S4. NanoSIMS images of [ $^{13}\text{C}$ ]cholesterol-loaded macrophages that had been plated onto a monolayer of [ $^{15}\text{N}$ ]choline-labeled SMCs and then incubated at either 37°C or 4°C. Macrophages are noted with large yellow arrows. NanoSIMS images were recorded from the cell interior. The large black holes represent regions of the silicon wafer not covered by cells. At 4°C,  $^{15}\text{N}$  enrichment of macrophages was very difficult to see but was ~13% above natural abundance.  $^{13}\text{C}$  enrichment in the surrounding SMCs was visible, but was not seen in abutting SMC plasma membranes or in cytosolic lipid droplets. Scale bar, 10  $\mu\text{m}$ . Ratio scales were multiplied by 10,000.**

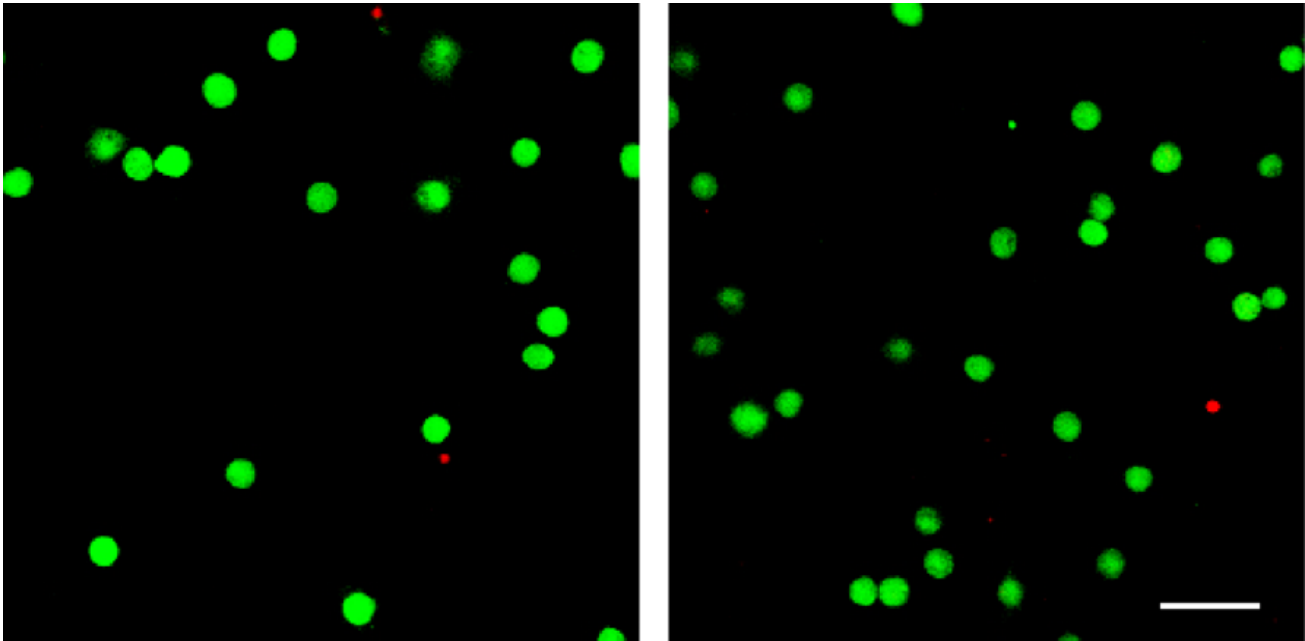

**Fig. S5. Cell viability assay on [<sup>13</sup>C]cholesterol-loaded macrophages after a 30-min incubation with methyl- $\beta$ -cyclodextrin (M $\beta$ CD).** Cell viability was assessed with the fluorescence-based LIVE/DEAD Cell Imaging Kit (ThermoFisher). Two fields are shown. Live cells fluoresce green; DNA from dead cells fluoresces red. Scale bar, 50  $\mu$ m.

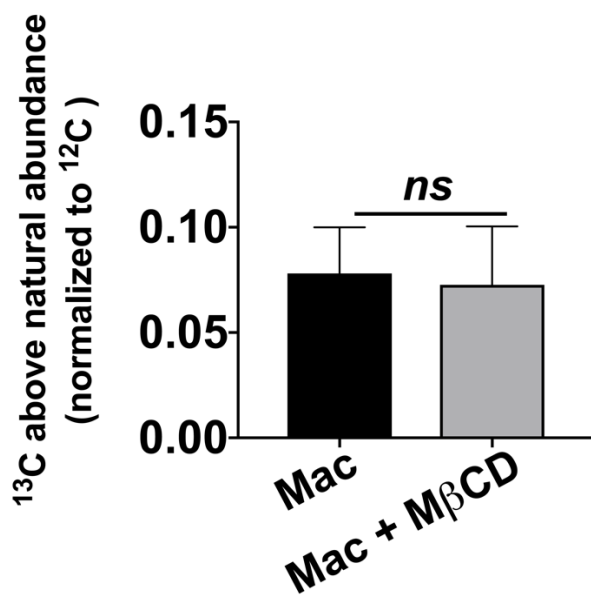

**Fig. S6. Pre-incubating [ $^{13}\text{C}$ ]cholesterol-loaded macrophages for 30 min with methyl- $\beta$ -cyclodextrin (M $\beta$ CD) did not result in a significant depletion of [ $^{13}\text{C}$ ]cholesterol from the interior of macrophages.** The  $y$ -axis shows  $^{13}\text{C}$  secondary ions (above natural abundance and normalized to  $^{12}\text{C}$ ) in the interior of macrophages. This graph shows  $^{13}\text{C}$  enrichment (mean  $\pm$  standard deviation) in macrophages (Mac) that were not pre-incubated with M $\beta$ CD ( $n = 9$ ) and macrophages that had been pre-incubated for 30 min with M $\beta$ CD (Mac + M $\beta$ CD) ( $n = 10$ ).

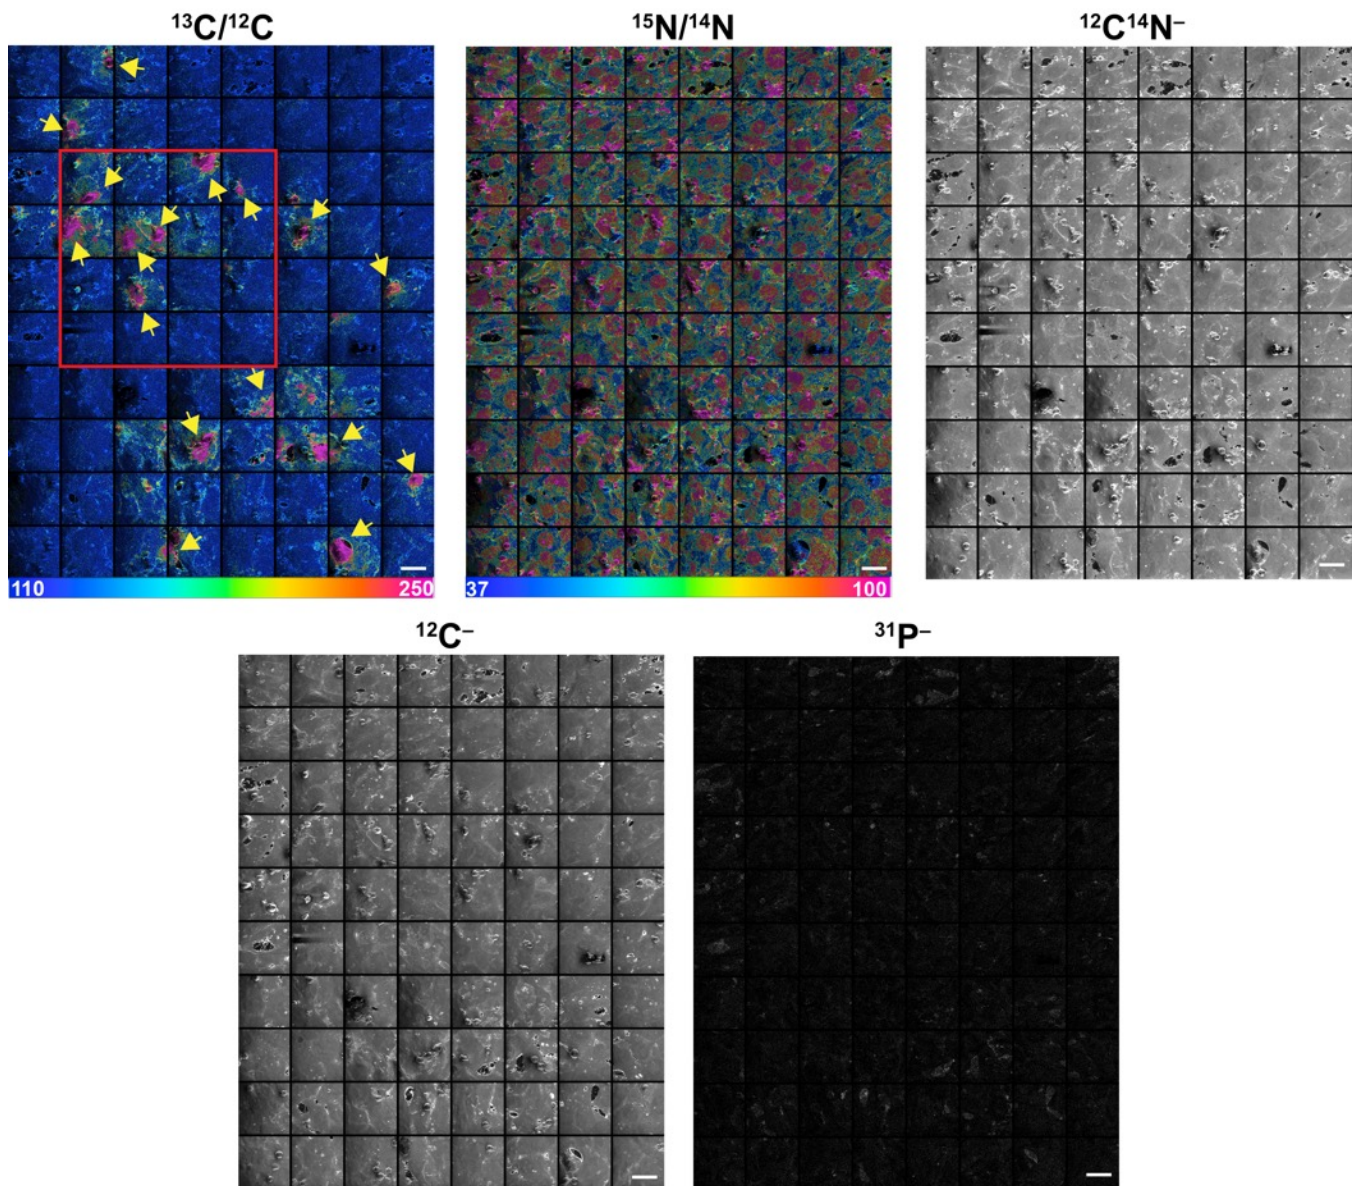

**Fig. S7. Transfer of  $^{13}\text{C}$ cholesterol from  $^{13}\text{C}$ cholesterol-loaded macrophages to adjacent smooth muscle cells (SMCs).** In this experiment, “accessible cholesterol” was removed from the plasma membrane of  $^{13}\text{C}$ cholesterol-loaded macrophages by incubating the cells with methyl- $\beta$ -cyclodextrin (M $\beta$ CD) for 30 min. The macrophages were then washed extensively and plated onto SMC (~90–95% confluent) that had been grown for 21 days in medium containing  $^{15}\text{N}$ choline.  $^{13}\text{C}$ cholesterol-loaded macrophages are noted with yellow arrows. A portion of this mosaic is shown in **Fig. 4** (boxed region). In this figure, the imaged area is  $\sim 400\ \mu\text{m} \times 500\ \mu\text{m}$ . Shown here are  $^{13}\text{C}/^{12}\text{C}$ ,  $^{15}\text{N}/^{14}\text{N}$ ,  $^{12}\text{C}^{14}\text{N}^-$ ,  $^{12}\text{C}^-$ , and  $^{31}\text{P}^-$  NanoSIMS images from the surface of cells. A slightly smaller NanoSIMS mosaic from the cell interior is shown in the *SI Appendix*, Fig. S8. Ratio scales were multiplied by 10,000. Scale bar,  $20\ \mu\text{m}$ .



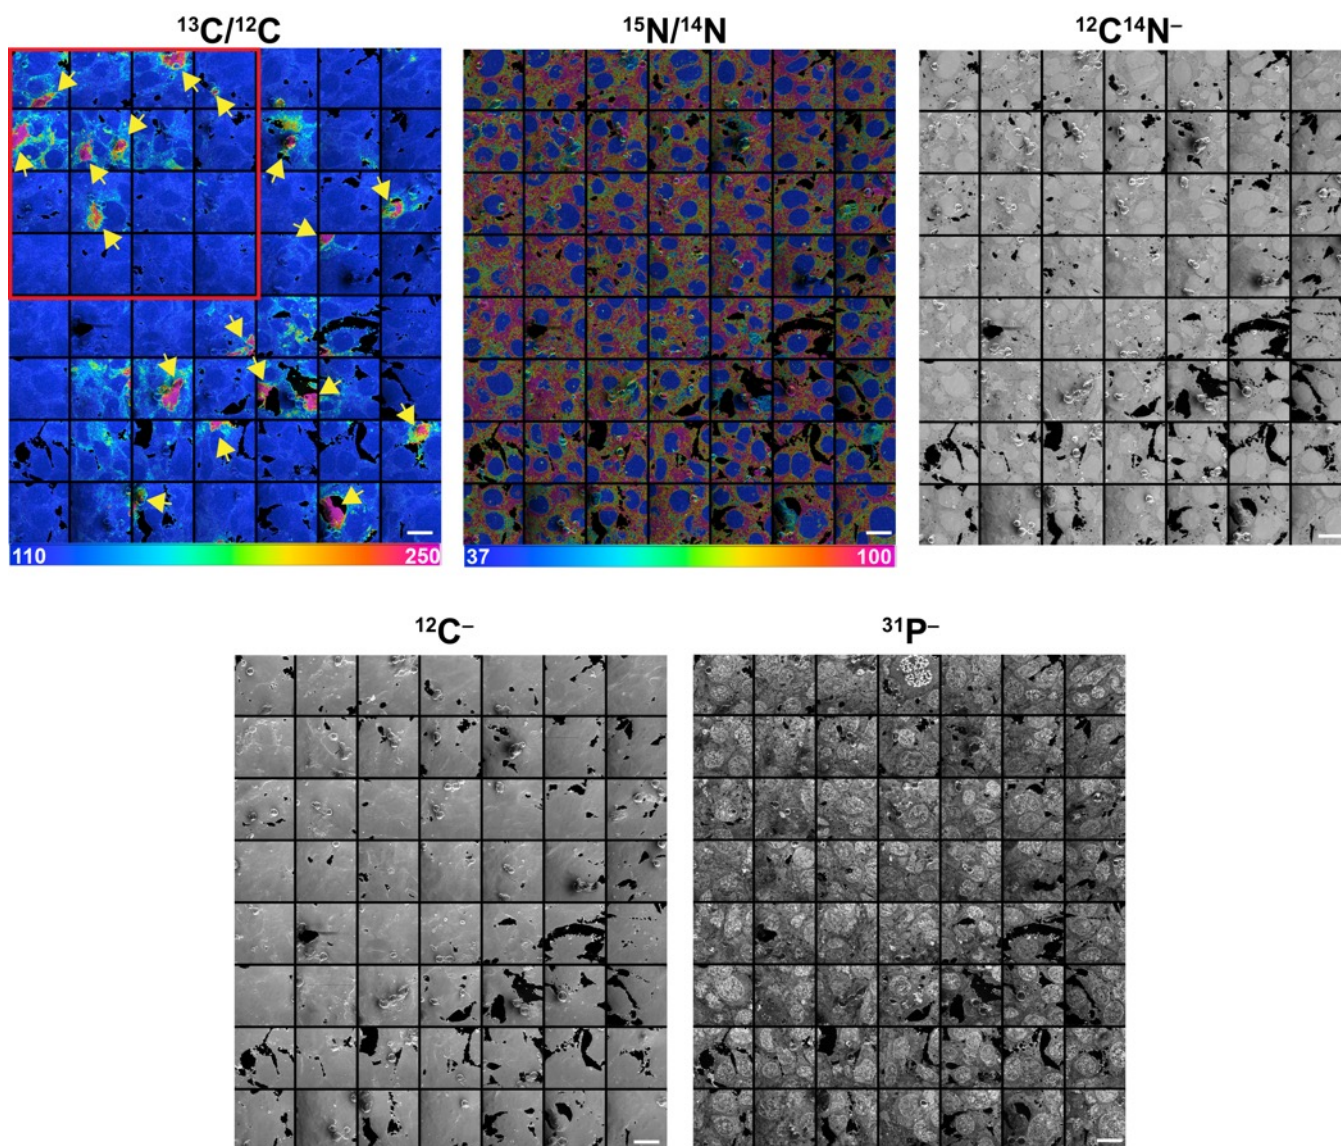

**Fig. S8. Transfer of  $^{13}\text{C}$ cholesterol from  $^{13}\text{C}$ cholesterol-loaded macrophages to adjacent smooth muscle cells (SMCs).** Cells were treated as described in Fig. S7.  $^{13}\text{C}$ cholesterol-loaded macrophages are noted with yellow arrows. A portion of this mosaic is shown in Fig. 4 (boxed region). In this figure, the imaged area is  $\sim 350\ \mu\text{m} \times 400\ \mu\text{m}$ . Shown here are  $^{13}\text{C}/^{12}\text{C}$ ,  $^{15}\text{N}/^{14}\text{N}$ ,  $^{12}\text{C}^{14}\text{N}^-$ ,  $^{12}\text{C}^-$ , and  $^{31}\text{P}^-$  NanoSIMS images from the cell interior. A slightly larger NanoSIMS mosaic from the cell surface is shown in the *SI Appendix*, Fig. S7. Ratio scales were multiplied by 10,000. Scale bar,  $20\ \mu\text{m}$ .

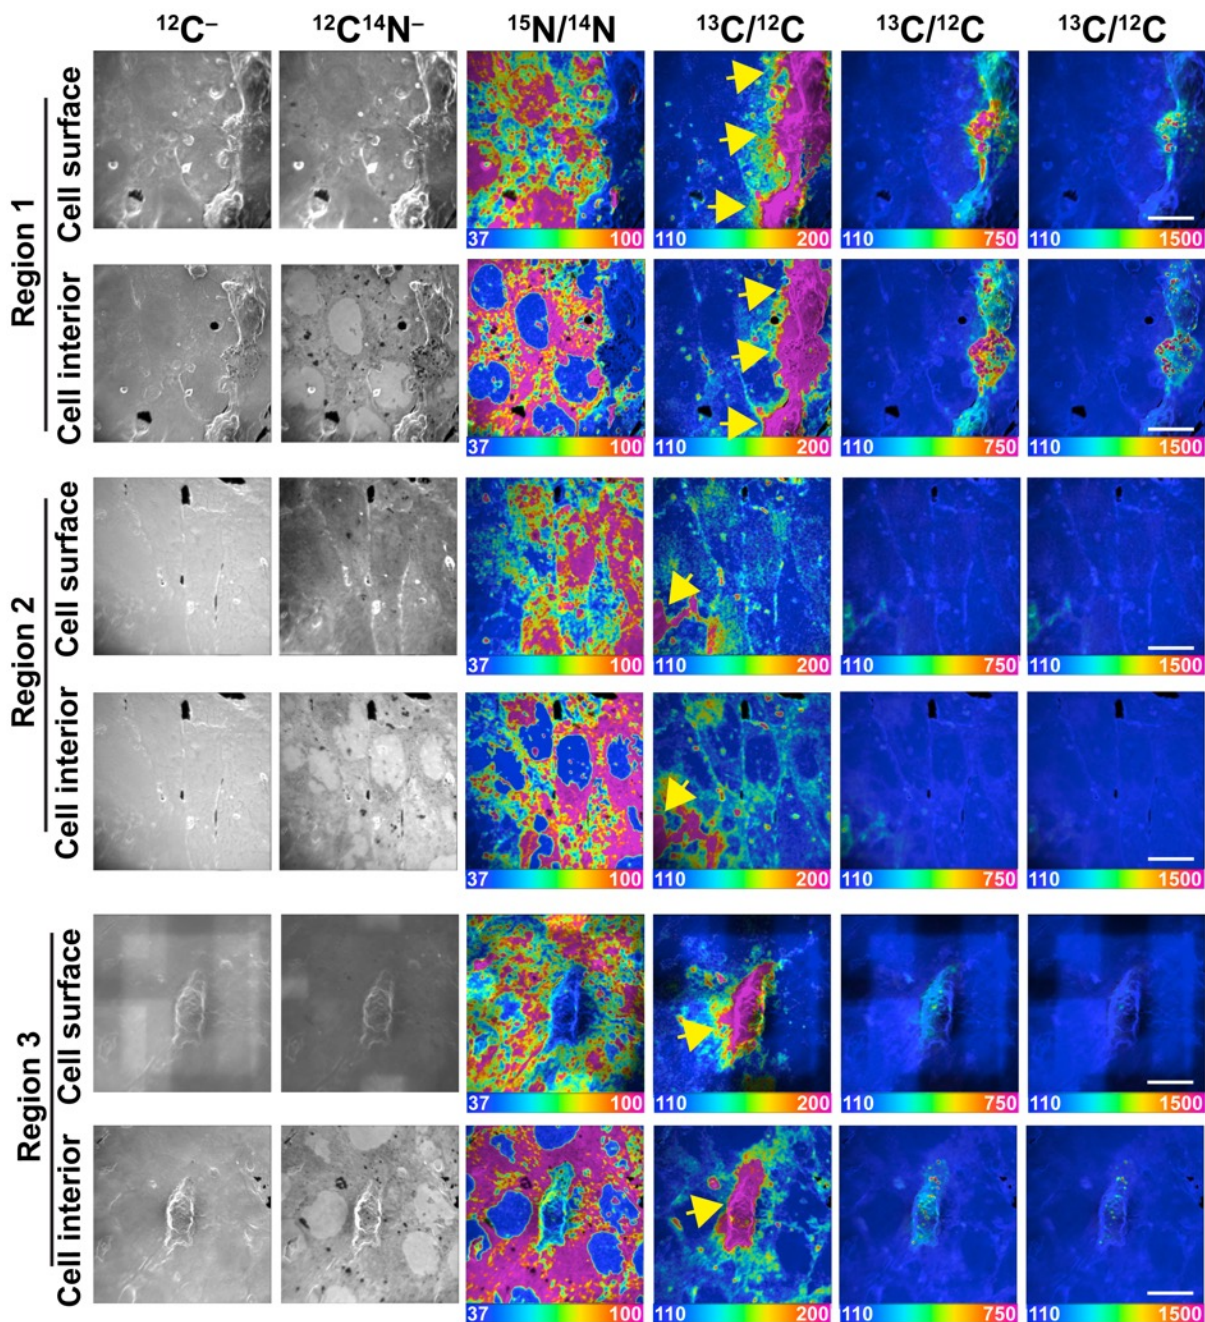

**Fig. S9. Transfer of  $[^{13}\text{C}]$ cholesterol from  $[^{13}\text{C}]$ cholesterol-loaded macrophages to adjacent smooth muscle cells (SMCs).**  $[^{13}\text{C}]$ cholesterol-loaded macrophages were plated onto a monolayer of SMCs (~90–95% confluency) that had been grown in medium containing  $[^{15}\text{N}]$ choline for 21 days. Shown here are NanoSIMS images of three fields of  $[^{13}\text{C}]$ cholesterol-loaded macrophages that had not been pre-incubated with methyl- $\beta$ -cyclodextrin. Images of both the cell surface and cell interior are shown.  $^{12}\text{C}^-$ ,  $^{12}\text{C}^{14}\text{N}^-$ ,  $^{13}\text{C}/^{12}\text{C}$  (three different scales), and  $^{15}\text{N}/^{14}\text{N}$  NanoSIMS images depict the transfer of  $[^{13}\text{C}]$ cholesterol from macrophages (yellow arrows) to SMCs. Ratio scales were multiplied by 10,000. Scale bar, 10  $\mu\text{m}$ .

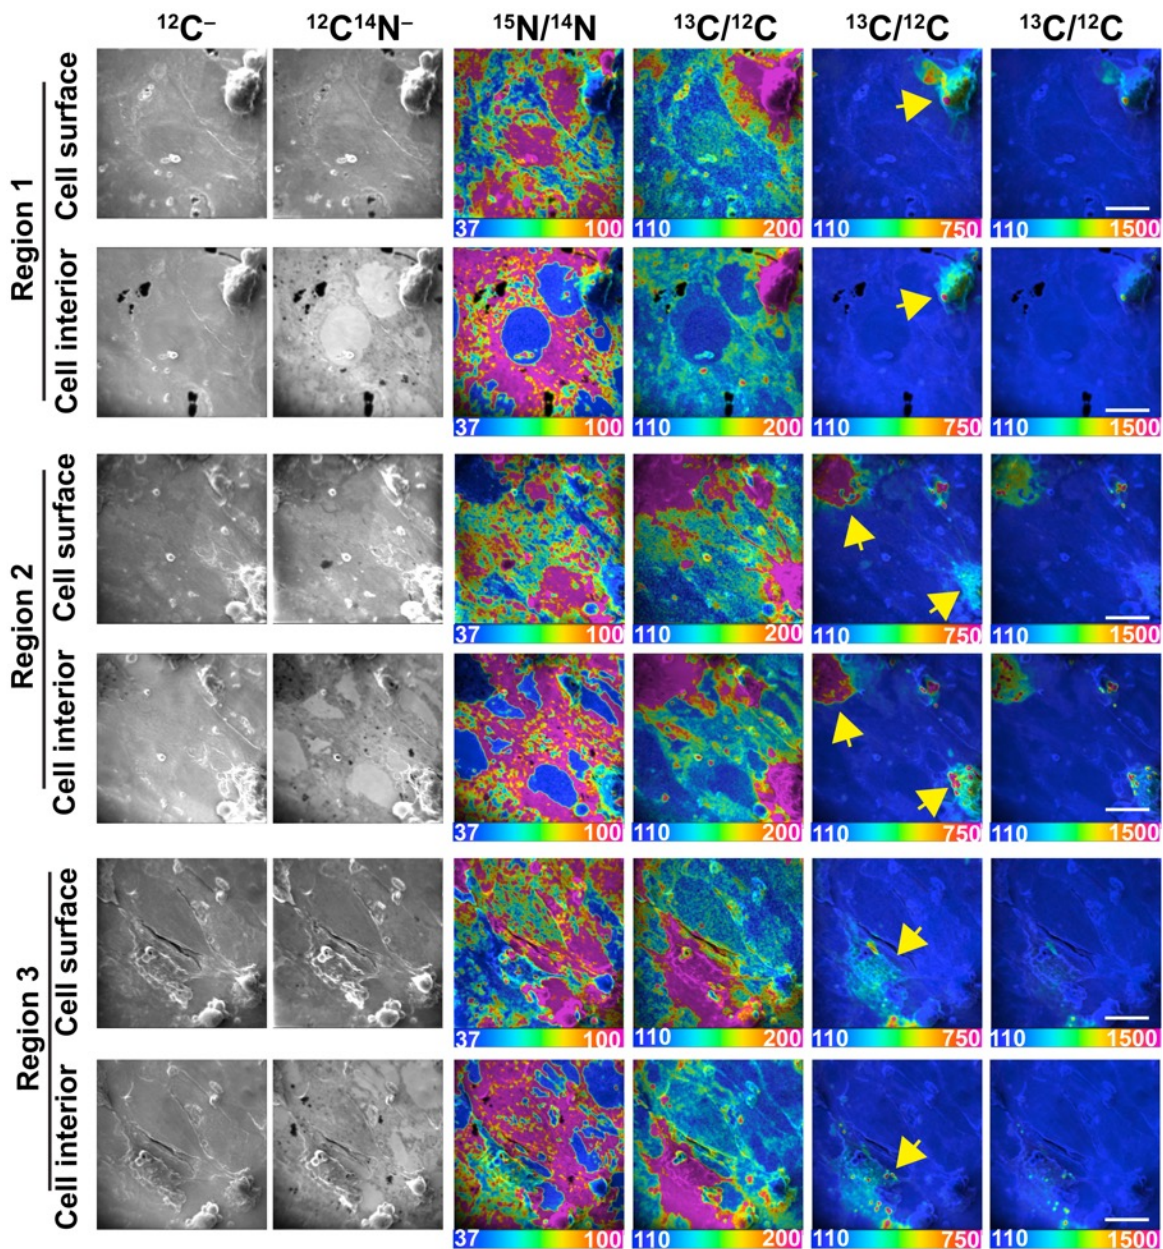

**Fig. S10. Transfer of  $^{13}\text{C}$ cholesterol from methyl- $\beta$ -cyclodextrin (M $\beta$ CD)-treated  $^{13}\text{C}$ cholesterol-loaded macrophages to adjacent smooth muscle cells (SMCs).**  $^{13}\text{C}$ cholesterol-loaded macrophages were plated onto a monolayer SMCs ( $\sim 90$ – $95\%$  confluent) that had been grown in medium containing  $^{15}\text{N}$ choline for 21 days. Shown here are NanoSIMS images of three fields of  $^{13}\text{C}$ cholesterol-loaded macrophages that had been pre-treated with M $\beta$ CD for 30 min before they were plated onto the SMC monolayer. Images of the cell surface and cell interior are shown.  $^{12}\text{C}^-$ ,  $^{12}\text{C}^{14}\text{N}^-$ ,  $^{13}\text{C}/^{12}\text{C}$  (three different scales), and  $^{15}\text{N}/^{14}\text{N}$  NanoSIMS images depict the transfer of  $^{13}\text{C}$ cholesterol from macrophages (yellow arrows) to SMCs. Ratio scales were multiplied by 10,000. Scale bar, 10  $\mu\text{m}$ .

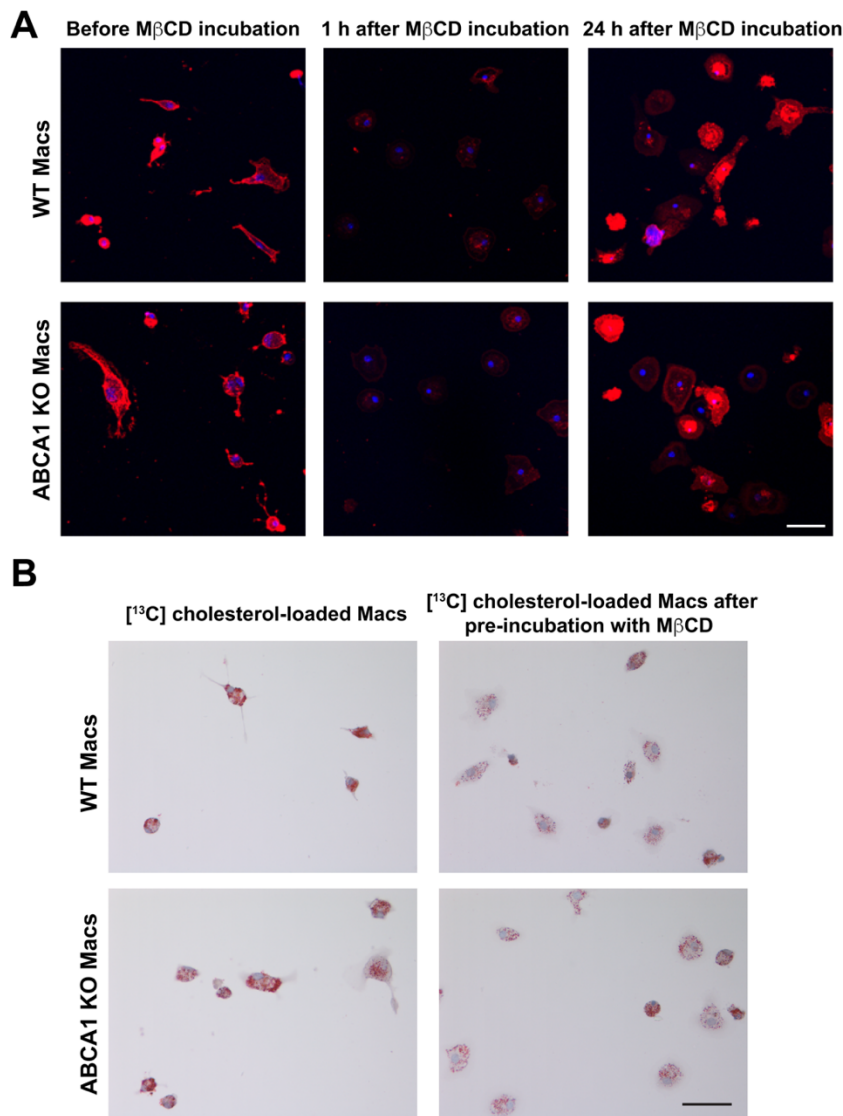

**Fig. S11. Depletion of “accessible cholesterol” from the plasma membrane of [ $^{13}$ C]cholesterol-loaded wild-type or ABCA1 knockout (KO) macrophages by incubating the cells with methyl- $\beta$ -cyclodextrin (M $\beta$ CD).** [ $^{13}$ C]Cholesterol-loaded macrophages were incubated with 10 mM M $\beta$ CD for 30 min, and the binding of Alexa 594-labeled ALO-D4 (red) to the cells was assessed 1 h and 24 h later. (A) Fluorescence microscopy of ALO-D4 binding to macrophages before and after the M $\beta$ CD treatment. In the absence of M $\beta$ CD, the binding of ALO-D4 (red) to macrophages was robust, but there was negligible binding of ALO-D4 1 h after M $\beta$ CD treatment. After 24 h, ALO-D4 binding returned to baseline levels. Cell nuclei were stained with DAPI (blue). Photomicrographs were obtained with identical settings. (B) Oil red O–stained wild-type and ABCA1 KO [ $^{13}$ C]cholesterol-loaded macrophages at baseline and 1 h after a 30-min incubation with 10 mM M $\beta$ CD. Cell nuclei were lightly stained with hematoxylin (blue). Scale bars, 50  $\mu$ m.

**Table S1. Transfer of [<sup>13</sup>C]cholesterol from [<sup>13</sup>C]cholesterol-loaded mouse peritoneal macrophages to smooth muscle cells (SMCs).<sup>1</sup>**

| <b>Figures</b>    | <b>Genotype of Macrophages</b> | <b>Pretreatment with MβCD<sup>2</sup></b> | <b>Percent <sup>13</sup>C ions in SMCs (mean ± SD)<sup>3</sup></b> | <b>Number of Macrophages</b> |
|-------------------|--------------------------------|-------------------------------------------|--------------------------------------------------------------------|------------------------------|
| Fig. 2A & Fig. S3 | WT                             | –                                         | 11.7 ± 1.8                                                         | 25                           |
| Fig. S8           | WT                             | +                                         | 8.1 ± 2.2                                                          | 22                           |
| Fig. S9           | WT                             | –                                         | 8.9 ± 2.9                                                          | 6                            |
| Fig. S10          | WT                             | +                                         | 12.9 ± 3.2                                                         | 11                           |
| Fig. 6            | WT                             | +                                         | 7.2 ± 3.9                                                          | 9                            |
| Fig. 6            | ABCA1 KO                       | +                                         | 5.9 ± 2.4                                                          | 8                            |

<sup>1</sup> This table summarizes data from six [<sup>13</sup>C]cholesterol coculture transfer experiments, showing the percentage of <sup>13</sup>C<sup>-</sup> secondary ions (above natural abundance and normalized to <sup>12</sup>C ions) in SMCs relative to <sup>13</sup>C<sup>-</sup> secondary ions (above natural abundance and normalized to <sup>12</sup>C secondary ions) in the [<sup>13</sup>C]cholesterol-loaded macrophages. In each experiment, [<sup>13</sup>C]cholesterol-loaded macrophages were plated on a SMC monolayer and incubated overnight. NanoSIMS images from each experiment are found in the indicated figures. Quantitative analyses of NanoSIMS data made it possible to quantify transfer of [<sup>13</sup>C]cholesterol from [<sup>13</sup>C]cholesterol-loaded mouse peritoneal macrophages to adjacent SMCs.

<sup>2</sup> In some experiments, [<sup>13</sup>C]cholesterol-loaded macrophages were pre-treated with MβCD (to deplete “accessible cholesterol” from the plasma membrane) before they were plated onto the SMC monolayer.

<sup>3</sup> Number of <sup>13</sup>C secondary ions (above natural abundance and normalized to <sup>12</sup>C secondary ions) in SMCs adjacent to [<sup>13</sup>C]cholesterol-loaded macrophages, expressed as a percentage of <sup>13</sup>C secondary ions (above natural abundance and normalized to <sup>12</sup>C secondary ions) in the [<sup>13</sup>C]cholesterol-loaded macrophages.
